# Supplementary material for: Functional up-converting SrTiO3:Er3+/Yb3+ nanoparticles: structural features, particle size, colour tuning and in vitro RBC cytotoxicity
Source: Royal Society of Chemistry journal article supplement (doi:10.1039/c5dt00671f), 2015-01-01
Supplement: c5dt00671f1.pdf [file c5dt00671f1.pdf]

## Supplementary Information

### **Functional up-converting $\text{SrTiO}_3\text{:Er}^{3+}/\text{Yb}^{3+}$ nanoparticles, structural features, particle size colour tuning and *in vitro* RBC cytotoxicity**

R. Pazik<sup>1\*</sup>, M. Maczka<sup>1</sup>, M. Malecka<sup>1</sup>, L. Marciniak<sup>1</sup>, L. Mrowczynska<sup>2</sup>, A. Ekner-Grzyb<sup>3</sup>,  
and R.J. Wiglusz<sup>1</sup>

<sup>1</sup>*Institute of Low Temperature and Structure Research, PAS, Okólna 2, 50-422 Wrocław, Poland*

<sup>2</sup>*Adam Mickiewicz University, Faculty of Biology, Department of Cell Biology, Umultowska 89, 61-614 Poznań, Poland*

<sup>3</sup>*Adam Mickiewicz University, Faculty of Biology, Department of Behavioural Ecology, Umultowska 89, 61-614 Poznań, Poland*

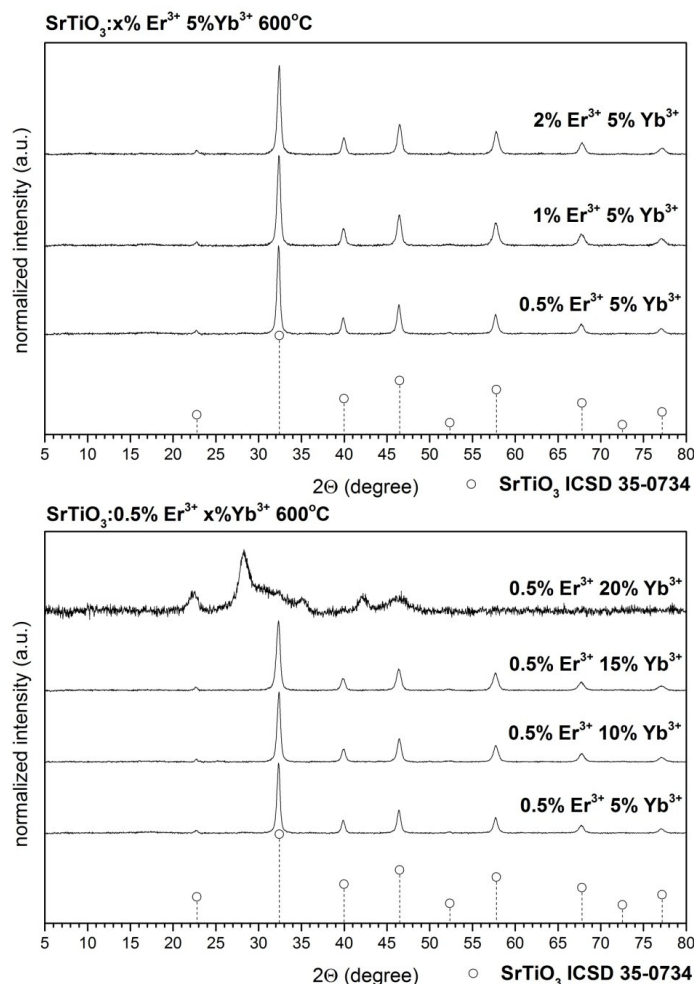

Fig. 1s. Effect of  $\text{Er}^{3+}$  (upper) and  $\text{Yb}^{3+}$  (bottom) concentration on crystal structure of the  $\text{SrTiO}_3$  heated at  $600^\circ\text{C}$ .

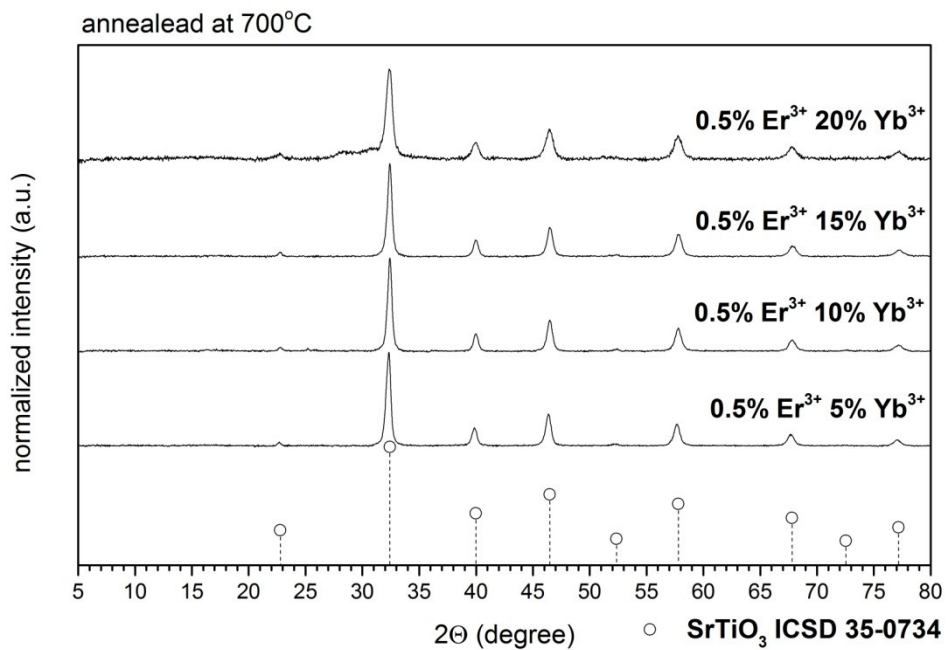

Fig. 2s. Compare with sample containing 20 mol% of Yb<sup>3+</sup> heat treated at 600°C with 20 mol% Yb<sup>3+</sup> sample at 700°C.

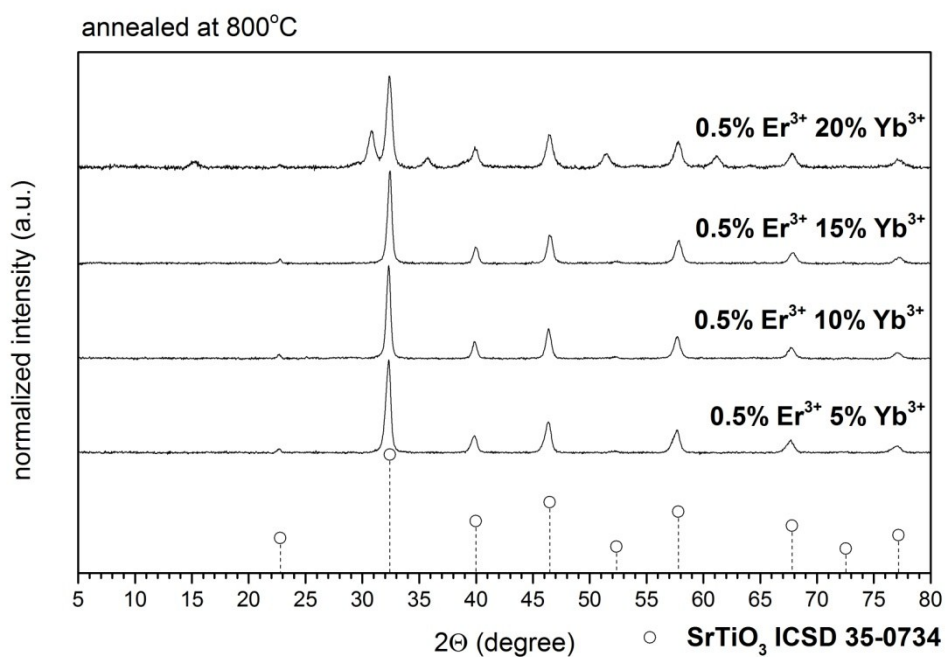

Fig. 3s. Note phase separation of the SrTiO<sub>3</sub> above 20 mol% of Yb<sup>3+</sup> at 800°C.

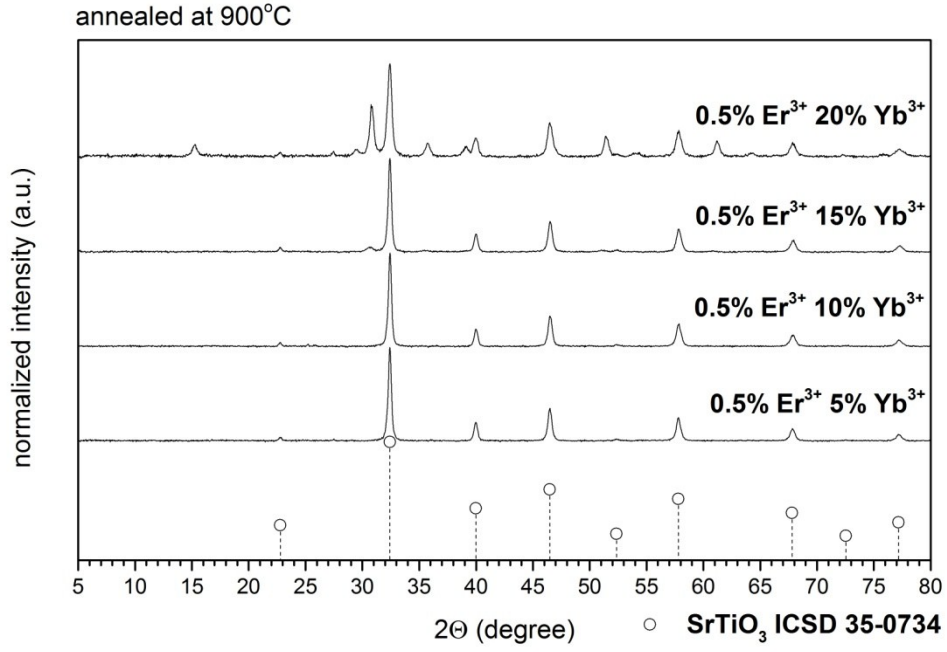

Fig. 4s. Note phase separation of the  $\text{SrTiO}_3$  with different content of  $\text{Yb}^{3+}$  above 15 mol% at 900°C.

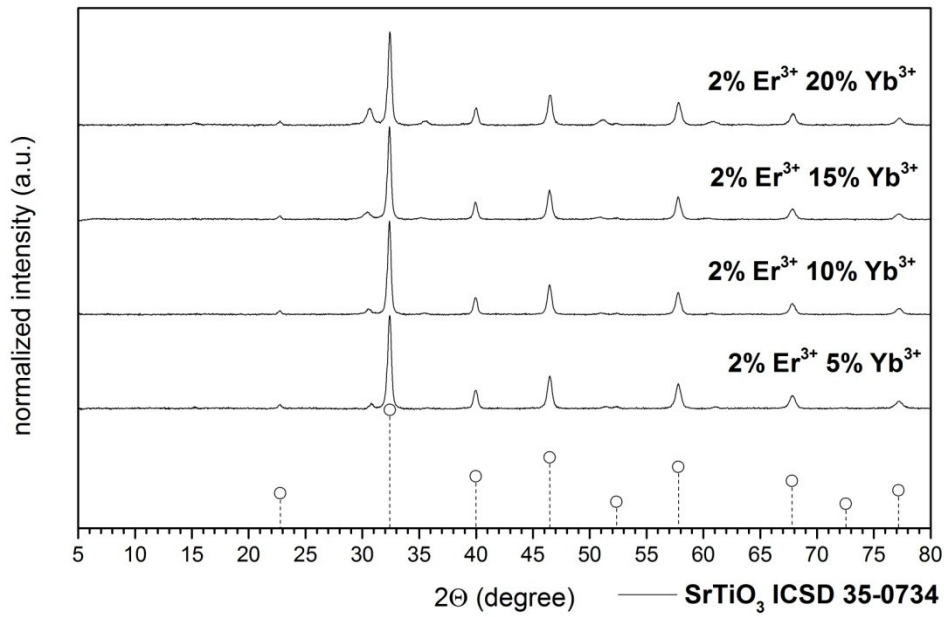

Fig. 5s. Note phase separation of the  $\text{SrTiO}_3$  with 2 mol% of  $\text{Er}^{3+}$  and different content of  $\text{Yb}^{3+}$  samples heated at 900°C.

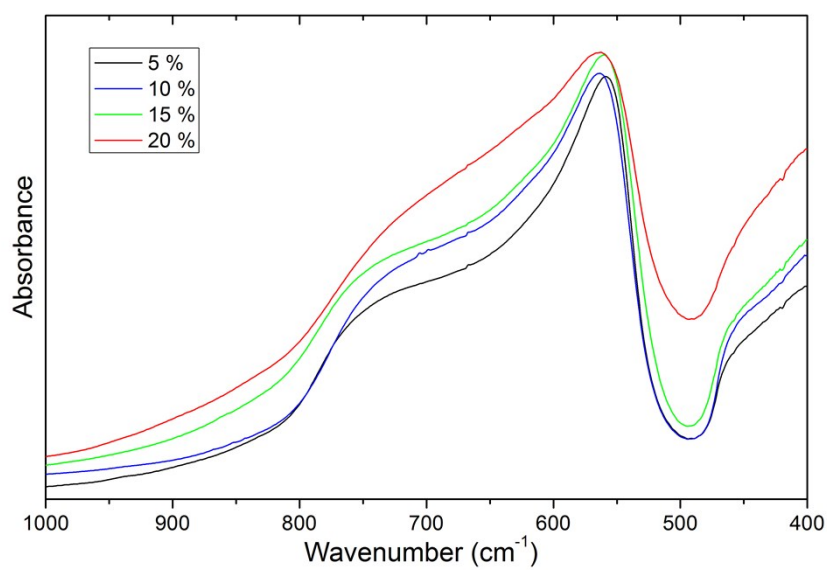

Fig. 6s. Mid-IR spectra of SrTiO<sub>3</sub> doped with 5, 10, 15 and 20 % of Yb<sup>3+</sup> and 0.5 % of Er<sup>3+</sup> annealed at 800 °C.

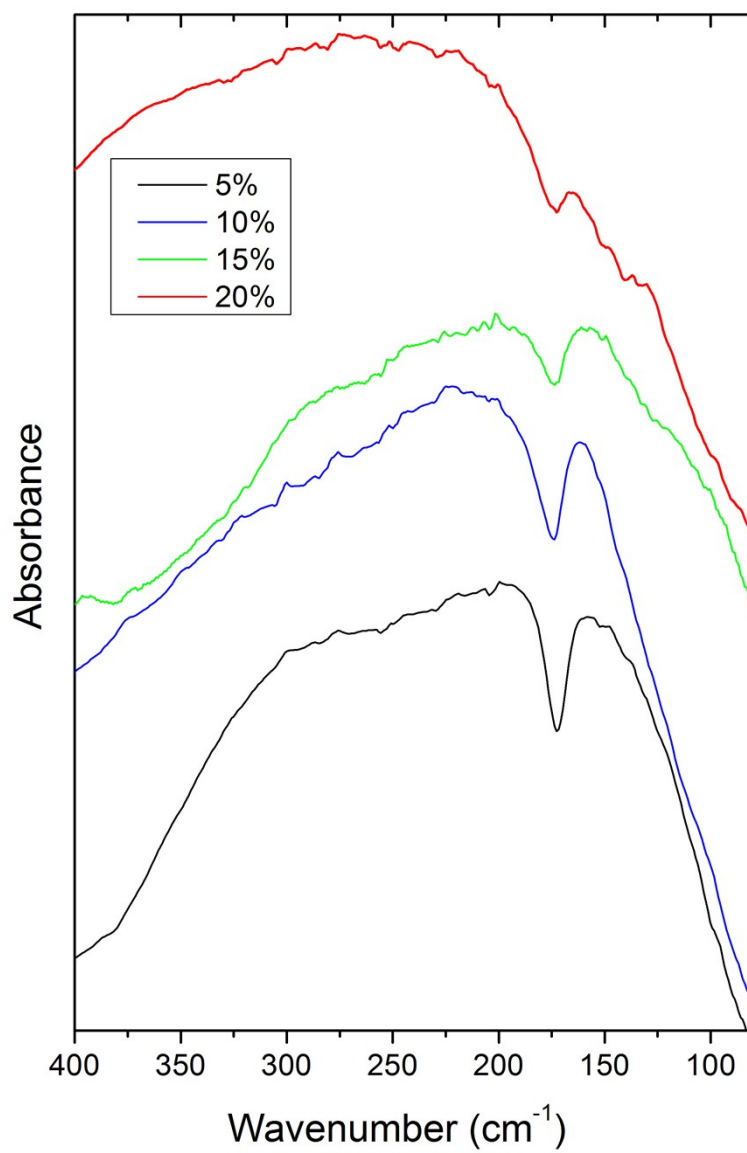

Fig. 7s. Far-IR spectra of SrTiO<sub>3</sub> doped with 5, 10, 15 and 20 % of Yb<sup>3+</sup> and 0.5 % of Er<sup>3+</sup> annealed at 800 °C.

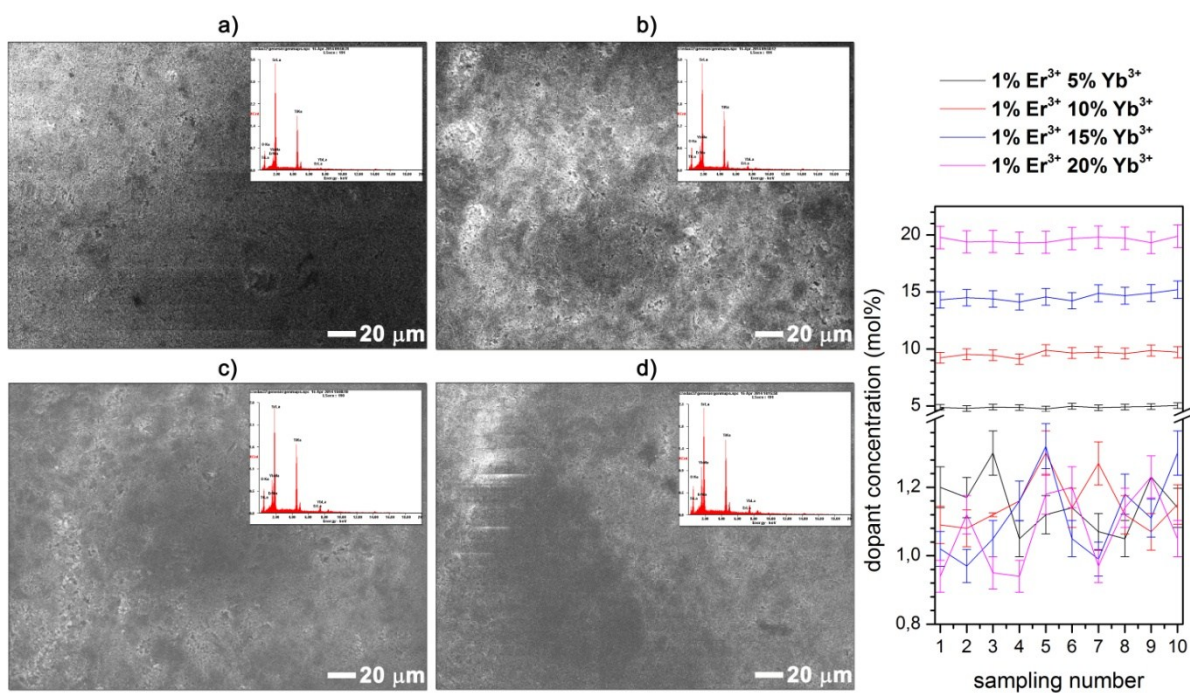

Fig. 8s. SEM-EDX analysis of the  $\text{SrTiO}_3$  1%  $\text{Er}^{3+}$  / x%  $\text{Yb}^{3+}$  nanoparticles sintered at 600°C.

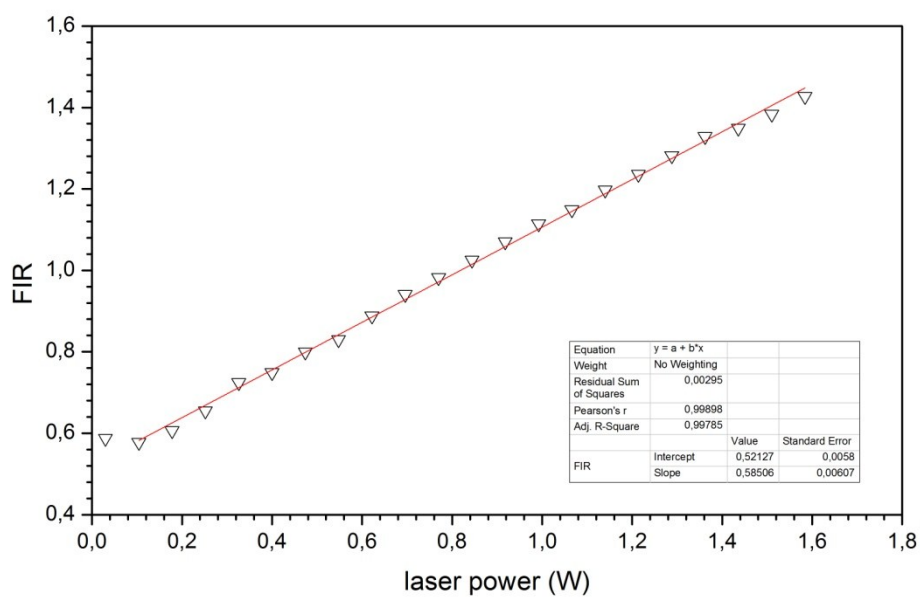

Fig. 9s. Calibration curve FIR vs. pump power.

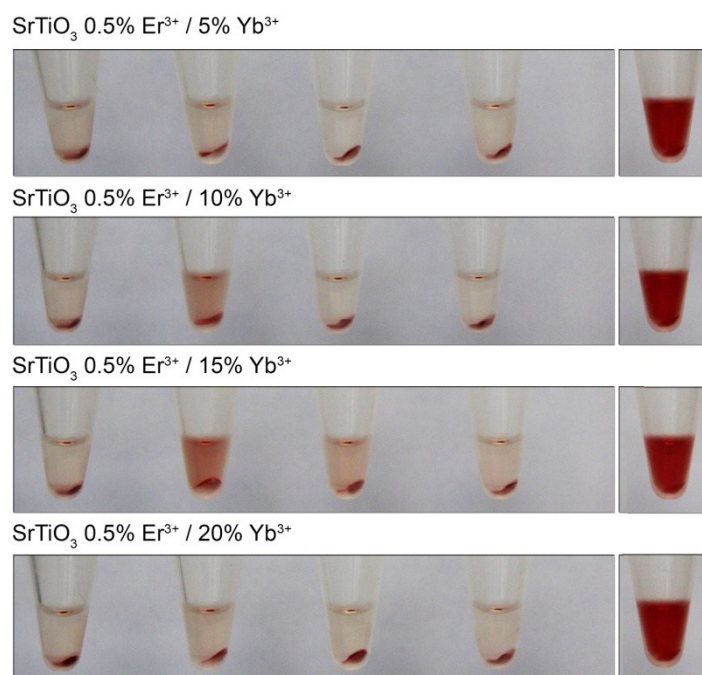

Fig. 10s. Hemolysis assay on human erythrocyte cells loaded with the SrTiO<sub>3</sub> 0.5% Er<sup>3+</sup> / x% Yb<sup>3+</sup> nanoparticles annealed at 600°C (from left side: negative control (PBS), 1 mg/ml, 0.1 mg/ml, 0.01 mg/ml, positive control (100% hemolysis, distilled water)).

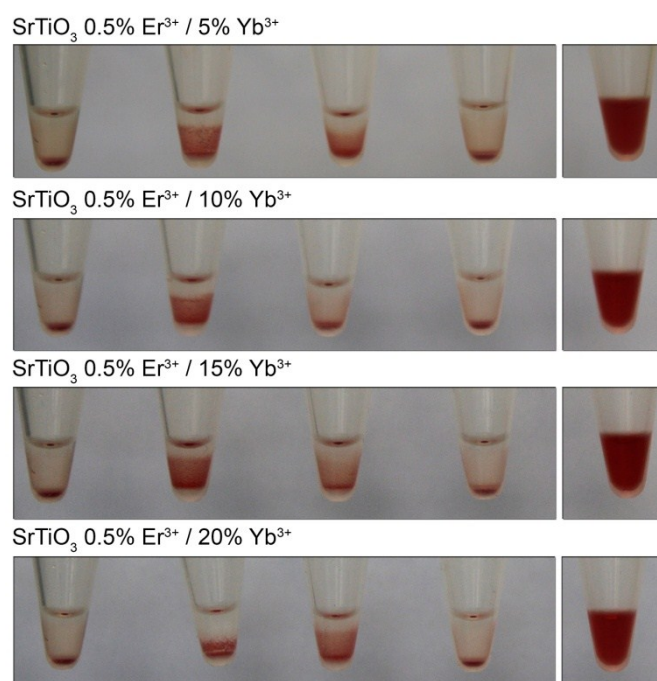

Fig. 11s. ESR of human erythrocyte cells loaded with the SrTiO<sub>3</sub> 0.5% Er<sup>3+</sup> / x% Yb<sup>3+</sup> nanoparticles annealed at 600°C (from left side: negative control (PBS), 1 mg/ml, 0.1 mg/ml, 0.01 mg/ml, positive control (100% hemolysis, distilled water)).
